# Supplementary material
Source: PubMed Central journal article supplement (PMC4151119)

A

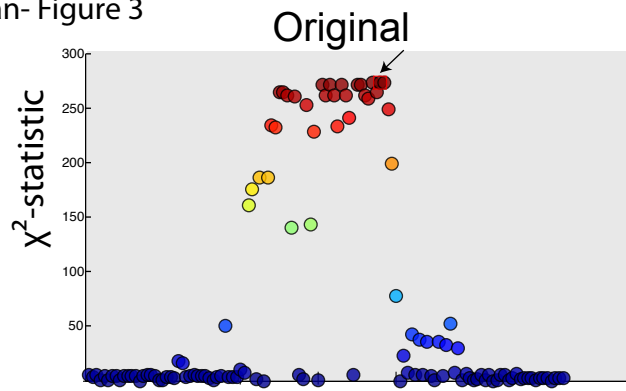

B

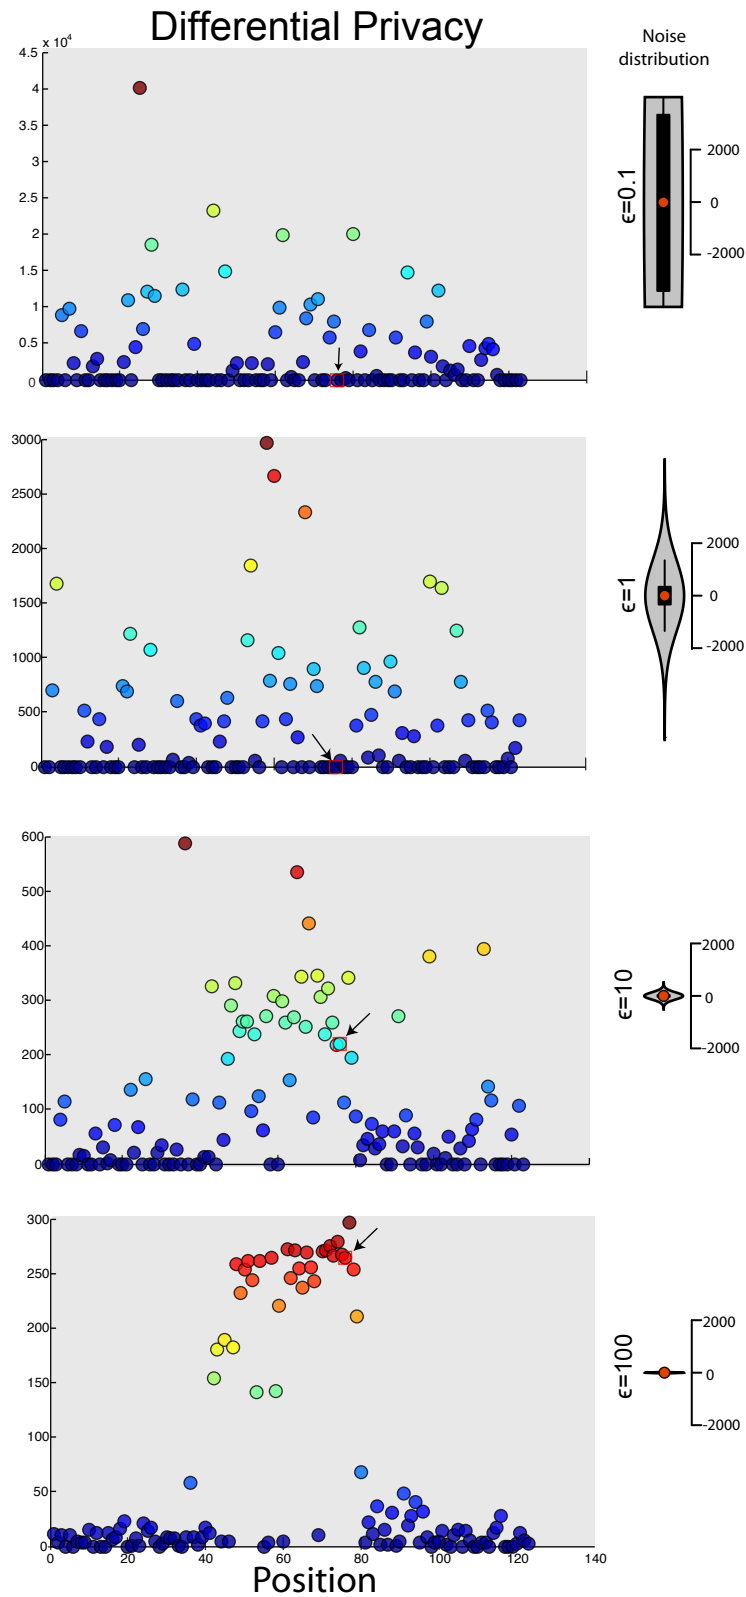

Supplement: NIHMS617276-supplement-Supp_Figure_1.pdf [file NIHMS617276-supplement-Supp_Figure_1.pdf]
